# Supplementary material for: A novel nomogram to predict the risk of requiring mechanical ventilation in patients with sepsis within 48 hours of admission: a retrospective analysis
Source: PeerJ journal article supplement (doi:10.7717/peerj.18500), 2024-11-01

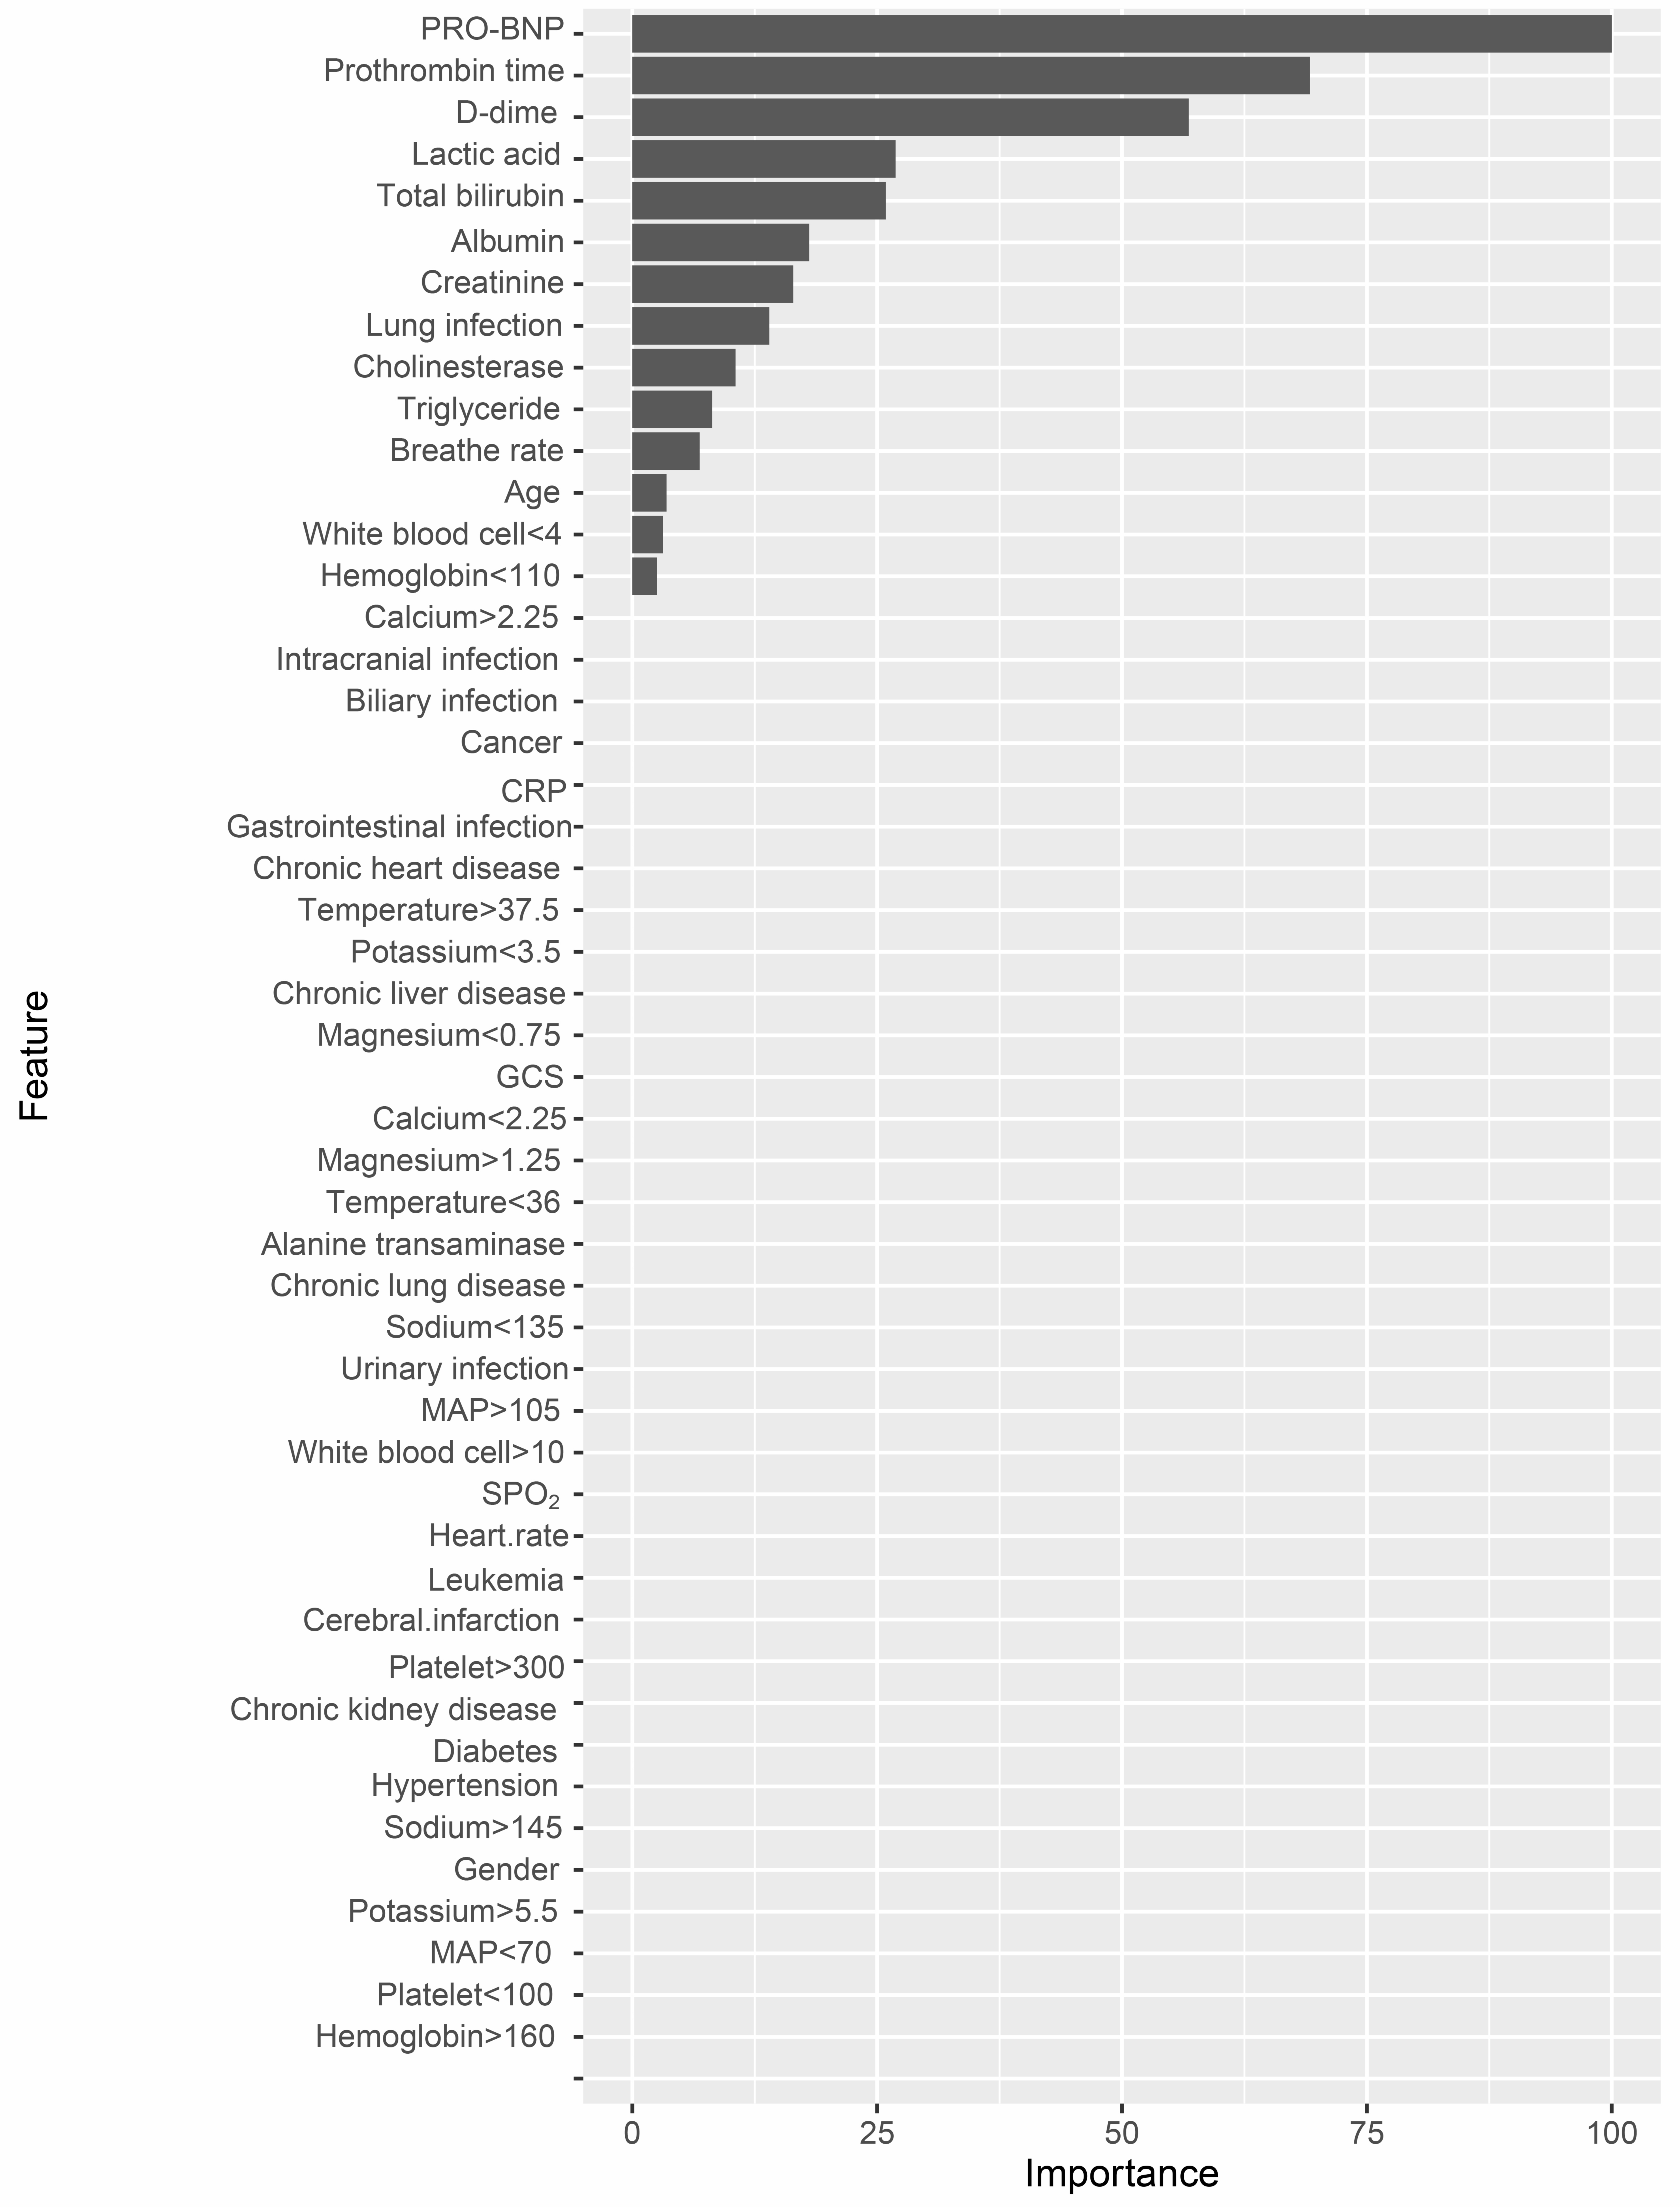

Supplement: Figure_S2.pdf [file Figure_S2.pdf]
